# Supplementary material for: How Fiber Surface Topography Affects Interactions between Cells and Electrospun Scaffolds: A Systematic Review
Source: MDPI journal article supplement (doi:10.3390/polym14010209), 2022-01-05
Supplement: s1 [file s1]

| Author(s)                | Title                                                                                                                                                                            | Periodical                                      | DOI name                           | Notes/Justification                                                                                   |
|--------------------------|----------------------------------------------------------------------------------------------------------------------------------------------------------------------------------|-------------------------------------------------|------------------------------------|-------------------------------------------------------------------------------------------------------|
| Abdolrahman Omidr        | Hierarchical fibrous guiding cues at different scales influence linear neurite extension                                                                                         | Acta biomaterialia                              | 10.1016/j.actbio.2020.07.014       | Not electrospinning but Solvent assisted spinning                                                     |
| Aidun, A.; Zamanian,     | Immobilization of polyvinyl alcohol-siloxane on the oxygen plasma-modified polyurethane-carbon nanotube composite matrix                                                         | Journal of Applied Polym Sci                    | 10.1002/app.48477                  | CNT use does not allow for isolation of topographical effects                                         |
| Arabi, A.; Boggs, E.; P  | Surface modification of electrospun polycaprolactone fibers and effect on cell proliferation                                                                                     | Surface Innovations                             | 10.1680/si.13.00018                | Topography not modified                                                                               |
| C. Simitzi; P. Efstatho  | Laser fabricated discontinuous anisotropic microconical substrates as a new model scaffold to control the directionality of neuronal network outgrowth                           | Biomaterials                                    | 10.1016/j.biomaterials.2015.07.008 | Not electrospun                                                                                       |
| Carl Zandén; Marina      | Surface characterisation of oxygen plasma treated electrospun polyurethane fibres and their interaction with red blood cells                                                     | European Polymer Jour                           | 10.1016/j.eurpolymj.2012.01.004    | Plasma modification caused surface texture change but red blood cells had similar behavior in control |
| Cheng, Q.; Lee, B.L.-P   | Plasma surface chemical treatment of electrospun poly(L-lactide) microfibrrous scaffolds for enhanced cell adhesion, growth, and infiltration                                    | Tissue Engineering - Part B                     | 10.1089/ten.tea.2011.0725          | No morphology modification                                                                            |
| Correia, D. M.; Ribeiro  | Superhydrophilic poly(L-lactic acid) electrospun membranes for biomedical applications obtained by argon and oxygen plasma                                                       | Applied Surface Science                         | 10.1016/j.apsusc.2016.02.121       | Only Ra is accounted for, but it changed plasma treatment didn't affect cell viability much           |
| Criscenti, G.; Vasilevic | 3D screening device for the evaluation of cell response to different electrospun microtopographies                                                                               | Acta biomaterialia                              | 10.1016/j.actbio.2017.03.049       | No surface topography modification, but shaped wells                                                  |
| D. Angelaki; P. Kavatz   | Laser-induced topographies enable the spatial patterning of co-cultured peripheral nervous system cells                                                                          | Materials Science and Engineering: C            | 10.1016/j.msec.2020.111144         | Not electrospun, Si used                                                                              |
| Dawei Li; Tong Wu; N     | Three-dimensional polycaprolactone scaffold via needleless electrospinning promotes cell proliferation and infiltration                                                          | Colloids and Surface Science                    | 10.1016/j.colsurfb.2014.06.034     | Hard to isolate effect of pores in fibers: morphology is generally different in DE scaffolds          |
| Elizabeth J. Tocce; Va   | The ability of corneal epithelial cells to recognize high aspect ratio nanostructures                                                                                            | Biomaterials                                    | 10.1016/j.biomaterials.2010.01.101 | Investigates contact guidance as opposed to cell adhesion, proliferation or differentiation           |
| F. Chen; C.N Lee; S.H    | Nanofibrous modification on ultra-thin poly(ε-caprolactone) membrane via electrospinning                                                                                         | Materials Science and Engineering: C            | 10.1016/j.msec.2006.05.004         | A film (membrane), not a scaffold, was coated with electrospun nanofibers                             |
| Fatemeh Jahanmard;       | Incorporation of F-MWCNTs into electrospun nanofibers regulates osteogenesis through stiffness and nanotopography                                                                | Materials Science and Engineering: C            | 10.1016/j.msec.2019.110163         | CNT use does not allow for isolation of topographical effects                                         |
| Fei Xu; Ian Gough; Jo    | Nanostructured degradable macroporous hydrogel scaffolds with controllable internal morphologies via reactive electrospinning                                                    | Acta biomaterialia                              | 10.1016/j.actbio.2019.12.038       | Multiple alterations made to the scaffolds no control used                                            |
| Guzman, R. C. de; Loe    | Electrospinning of matrigel to deposit a basal lamina-like nanofiber surface                                                                                                     | Journal of Biomaterials Research                | 10.1163/092050609X12457428936116   | No relevant intervention                                                                              |
| Hem Raj Pant; Madha      | Fabrication of highly porous poly (ε-caprolactone) fibers for novel tissue scaffold via water-bath electrospinning                                                               | Colloids and Surface Science                    | 10.1016/j.colsurfb.2011.07.045     | No relevant intervention                                                                              |
| Hong Nam Kim; Yoon       | Effect of orientation and density of nanotopography in dermal wound healing                                                                                                      | Biomaterials                                    | 10.1016/j.biomaterials.2012.08.038 | No electrospinning involved                                                                           |
| Honglin Chen; Xiaobi     | Tailoring surface nanoroughness of electrospun scaffolds for skeletal tissue engineering                                                                                         | Acta biomaterialia                              | 10.1016/j.actbio.2017.07.003       | Cell differentiation is affected by controlling surface roughness                                     |
| Huaqiong Li; Feng W      | Direct laser machining-induced topographic pattern promotes up-regulation of myogenic markers in human mesenchymal stem cells                                                    | Acta biomaterialia                              | 10.1016/j.actbio.2011.09.029       | Substrate is a film, not electrospun                                                                  |
| Hyun Jong Lee; Seun      | Micropatterned Fibrous Scaffolds Fabricated Using Electrospinning and Hydrogel Lithography: New Platforms to Create Cellular Topography                                          | Sensors and Actuators B: Chemical               | 10.1016/j.snb.2010.05.032          | Patterns are made on the scaffold, not individual fibers                                              |
| J. Idaszek; E. Kijęńska; | How important are scaffolds and their surface properties in regenerative medicine                                                                                                | Applied Surface Science                         | 10.1016/j.apsusc.2016.03.038       | This is a review                                                                                      |
| J. Pelipenko; P. Kocbe   | The topography of electrospun nanofibers and its impact on the growth and mobility of keratinocytes                                                                              | European Journal of Cell Biology                | 10.1016/j.ejcb.2012.09.009         | Control is not an electrospun scaffold                                                                |
| Jaba Mitra; Shilpee Ja   | Patterned growth and differentiation of neural cells on polymer derived carbon substrates with micro/nano structures in vitro                                                    | Carbon                                          | 10.1016/j.carbon.2013.08.008       | Control is a film, not an electrospun substrate                                                       |
| Jaiswal, A.              | Nanofibrous Scaffolds for Tissue Engineering Applications                                                                                                                        | Brazilian Archives of Biology and Biotechnology | 10.1590/1678-4324-2016150644       | Topography of scaffold as a whole, not fibers, was evaluated                                          |
| James M. Dugan; Rich     | Oriented surfaces of adsorbed cellulose nanowhiskers promote skeletal muscle myogenesis                                                                                          | Acta biomaterialia                              | 10.1016/j.actbio.2012.08.050       | Substrate not electrospun                                                                             |
| Jeon, H.; Kim, G.        | Preparation and characterization of an electrospun polycaprolactone (PCL) fibrous mat and multi-layered PCL scaffolds having a nanosized pattern-surface for tissue regeneration | Journal of Materials Chemistry B                | 10.1039/c3tb21230k                 | Plasma treatment changes cell behavior                                                                |
| Jeong In Kim; Cheol S    | Harnessing nanotopography of PCL/collagen nanocomposite membrane and changes in cell morphology coordinated with wound healing activity                                          | Materials Science and Engineering: C            | 10.1016/j.msec.2018.06.021         | Topography refers to fiber alignment here                                                             |
| Jie Shi Chua; Choon-R    | Extending neurites sense the depth of the underlying topography during neuronal differentiation and contact guidance                                                             | Biomaterials                                    | 10.1016/j.biomaterials.2014.06.008 | Substrate not electrospun                                                                             |
| Johnson, C. D.; D'Am     | Electrospun fiber surface nanotopography influences astrocyte-mediated neurite outgrowth                                                                                         | Biomedical Materials                            | 10.1088/1748-605X/aac4de           | Outcome is neurite outgrowth, so not included                                                         |

|                                                |                                                                                                                                                                                            |                                                                       |                                      |                                                                    |
|------------------------------------------------|--------------------------------------------------------------------------------------------------------------------------------------------------------------------------------------------|-----------------------------------------------------------------------|--------------------------------------|--------------------------------------------------------------------|
| K.M. Pawelec; C. Yoon                          | Engineering a platform for nerve regeneration with direct application to nerve repair technology                                                                                           | Biomaterials                                                          | 10.1016/j.biomaterials.2019.119263   | Channeled scaffold was created, not with fiber surface topography  |
| Kim, H. H.; Kim, M. J.;                        | Effect of fiber diameter on surface morphology, mechanical property, and cell behavior of electrospun poly( $\epsilon$ -caprolactone) mat                                                  | Fibers and Polymers                                                   | 10.1007/s12221-016-6350-x            | Fiber diameter was altered, also no proper control                 |
| Kim, J. I.; Hwang, T. I.;                      | Regulating Electrical Cue and Mechanotransduction in Topological Gradient Structure Modulated Piezoelectric Scaffolds to Predict Neural Cell Response                                      | Advanced Functional Materials                                         | 10.1002/adfm.201907330               | Treats topography as fiber alignment/structure morphology          |
| Leong, Meng Fatt; Chong, Yee J.                | Effect of electrospun poly(D,L-lactide) fibrous scaffold with nanoporous surface on attachment of porcine esophageal epithelial cells and protein adsorption                               | Journal of Biomedical Materials Research Part B: Applied Biomaterials | 10.1002/jbm.b.32061                  |                                                                    |
| Lesley Y. Chan; William Y. Chan                | Temporal application of topography to increase the rate of neural differentiation from human pluripotent stem cells                                                                        | Biomaterials                                                          | 10.1016/j.biomaterials.2012.09.033   | Substrate not electrospun                                          |
| Li, Yan-Fang; Rubert, J.                       | Ultraporous interweaving electrospun microfibers from PCL-PEO binary blends and their inflammatory responses                                                                               | Nanoscale                                                             | 10.1039/c3nr06197c                   |                                                                    |
| Liao, Susan; Nguyen, T. T. T.                  | Biomimetic Nanocomposites to Control Osteogenic Differentiation of Human Mesenchymal Stem Cells                                                                                            | Advanced Healthcare Materials                                         | 10.1002/adhm.201300207               |                                                                    |
| Lim, M. M.; Sun, T.; Sun, Y.                   | In vitro biological evaluation of electrospun polycaprolactone/gelatine nanofibrous scaffold for tissue engineering                                                                        | Journal of Nanomaterials                                              | 10.1155/2015/303426                  | Surface topography of fibers not regarded                          |
| Lin Jiang; Liwei Wang                          | Fabrication of polycaprolactone electrospun fibers with different hierarchical structures mimicking collagen fibrils for tissue engineering scaffolds                                      | Applied Surface Science                                               | 10.1016/j.apsusc.2017.08.005         |                                                                    |
| Lorenzo Moroni; Rui Chen                       | Fiber diameter and texture of electrospun PEOT/PBT scaffolds influence human mesenchymal stem cell proliferation and morphology, and the release of incorporated compounds                 | Biomaterials                                                          | 10.1016/j.biomaterials.2006.05.027   |                                                                    |
| M. Tallawi; D. Dippold                         | Novel PGS/PCL electrospun fiber mats with patterned topographical features for cardiac patch applications                                                                                  | Materials Science and Engineering: B                                  | 10.1016/j.msec.2016.06.083           | topography of scaffold, not fibers, modified                       |
| M.M. Machado-Paula; A. C. de Lencastre         | A comparison between electrospinning and rotary-jet spinning to produce PCL fibers with low bacteria colonization                                                                          | Materials Science and Engineering: B                                  | 10.1016/j.msec.2020.110706           | Fibers are not modified, no cell assay                             |
| Maharjan, Bikendra; Khatun, S.                 | In-situ polymerized polypyrrole nanoparticles immobilized poly( $\epsilon$ -caprolactone) electrospun conductive scaffolds for bone tissue engineering                                     | Materials science & engineering: B                                    | 10.1016/j.msec.2020.111056           | Polypyrrole alters conductivity, does not isolate topography       |
| Mertgen, A. S.; Yazga, M.                      | Controlling the surface structure of electrospun fibers: Effect on endothelial cells and blood coagulation                                                                                 | Biointerphases                                                        | 10.1116/1.5047668                    |                                                                    |
| Miji Yeo; GeunHyung Lee                        | Nano/microscale topographically designed alginate/PCL scaffolds for inducing myoblast alignment and myogenic differentiation                                                               | Carbohydrate Polymers                                                 | 10.1016/j.carbpol.2019.115041        | Substrate not electrospun                                          |
| Mirakabad, F. S. T.; Khan, M. A.               | The effect of clay nanoparticles on surface topography of polymeric scaffolds and mesenchymal stem cell attachment                                                                         | BiolImpacts                                                           | 10.15171/bi.2018.S1                  | Clay use does not allow for isolation of topographical effects     |
| Monireh Kouhi; Mohsen Shariati                 | Poly L lysine-modified PHBV based nanofibrous scaffolds for bone cell mineralization and osteogenic differentiation                                                                        | Applied Surface Science                                               | 10.1016/j.apsusc.2018.06.239         | Roughness of scaffold, not fiber surface, modified                 |
| Nandakumar, A.; Birgitte K. Teichgraber        | Surface modification of electrospun fibre meshes by oxygen plasma for bone regeneration                                                                                                    | Biofabrication                                                        | 10.1088/1758-5082/5/1/015006         | some osteogenic markers were upregulated                           |
| Negar Abbasi Aval; Ramin Ghahremani            | Nano-featured poly (lactide-co-glycolide)-graphene microribbons as a promising substrate for nerve tissue engineering                                                                      | Composites Part B: Engineering                                        | 10.1016/j.compositesb.2019.05.074    | Graphene use does not allow for isolation of topographical effects |
| Ozan Ozkan; Hilal Turker                       | Effects of nozzle type atmospheric dry air plasma on L929 fibroblast cells hybrid poly ( $\epsilon$ -caprolactone)/chitosan/poly ( $\epsilon$ -caprolactone) scaffolds interactions        | Journal of Bioscience                                                 | 10.1016/j.jbiosc.2016.01.004         |                                                                    |
| Park, B. J.; Seo, H. J.; Kim, H. S.            | Cellular responses of vascular endothelial cells on surface modified polyurethane films grafted electrospun PLGA fiber with microwave-induced plasma at atmospheric pressure               | Surface & Coatings Technology                                         | 10.1016/j.surfcoat.2010.07.087       | Substrate not electrospun                                          |
| Punamshree Das; Narayan Das                    | Surface modification of electrospun PVA/chitosan nanofibers by dielectric barrier discharge plasma at atmospheric pressure and studies of their mechanical properties and biocompatibility | International Journal of Biological Macromolecules                    | 10.1016/j.ijbiomac.2018.03.115       |                                                                    |
| Roya Dastjerdi; Mahdi Gholami                  | A pathway toward new era of intelligent cell attachment; mechanism and a key major guideline                                                                                               | Journal of Cleaner Production                                         | 10.1016/j.jclepro.2020.121873        | No control                                                         |
| Sachot, N.; Castaño, C.                        | Hierarchically engineered fibrous scaffolds for bone regeneration                                                                                                                          | J. R. Soc. Interface                                                  | 10.1098/rsif.2013.0684               |                                                                    |
| Saeed, M.; Mirzadeh, H.                        | Rationalization of specific structure formation in electrospinning process: Study on nano-fibrous PCL- and PLGA-based scaffolds                                                            | Journal of Biomedical Materials Research Part B: Applied Biomaterials | 10.1002/jbm.b.35520                  | Varies scaffold morphology, not fiber surface                      |
| Saravana Kumar Jaganathan; S. S. Senthil Kumar | Biomimetic electrospun polyurethane matrix composites with tailor made properties for bone tissue engineering scaffolds                                                                    | Polymer Testing                                                       | 10.1016/j.polymertesting.2019.105955 | No modification of fiber surface                                   |
| Schaub, N. J.; Britton, D.                     | Engineered nanotopography on electrospun PLLA microfibers modifies RAW 264.7 cell response                                                                                                 | ACS applied materials                                                 | 10.1021/am402827g                    |                                                                    |
| Seda Surucu; Kai Mascherbauer                  | Atmospheric plasma surface modifications of electrospun PCL/chitosan/PCL hybrid scaffolds by nozzle type plasma jets for usage of cell cultivation                                         | Applied Surface Science                                               | 10.1016/j.apsusc.2016.05.123         |                                                                    |
| Taskin, Mehmet Berat; Aydin, Mustafa           | Nanotopography featured polycaprolactone/polyethyleneoxide microfibers modulate endothelial cell response                                                                                  | Nanoscale                                                             | 10.1039/C7NR03326E                   |                                                                    |
| Tiryaki, V.; Ayres, V. M.                      | Quantitative investigation of differences in differentiation of reactive and nonreactive astrocytes in response to nanophysical cues                                                       | Mol. Biol. Cell                                                       |                                      | Source appears to be a congress presentation, not accessible       |

|                          |                                                                                                                                                                                         |                         |                                          |                                                                                            |
|--------------------------|-----------------------------------------------------------------------------------------------------------------------------------------------------------------------------------------|-------------------------|------------------------------------------|--------------------------------------------------------------------------------------------|
| Wang, Ting; Feng, Zh     | Nanoporous fibers of type-I collagen coated poly( L-lactic acid) for enhancing primary hepatocyte growth and function                                                                   | J. Mater. Chem. B       | 10.1039/C2TB00195K                       |                                                                                            |
| Wang, Xiaofeng; Salic    | Poly(ε-caprolactone) Nanofibers with a Self-Induced Nanohybrid Shish-Kebab Structure Mimicking Collagen Fibrils                                                                         | Biomacromolecules       | 10.1021/bm400928b                        |                                                                                            |
| Wang, Y.; Deng, J.; Fa   | Novel nanoscale topography on poly(propylene carbonate)/poly(ε-caprolactone) electrospun nanofibers modifies osteogenic capacity of ADCs                                                | RSC Advances            | 10.1039/c5ra15841a                       |                                                                                            |
| Xiaozhi Ren; Jinxiu Li;  | Aligned porous fibrous membrane with a biomimetic surface to accelerate cartilage regeneration                                                                                          | Chemical Engineering    | 10.1016/j.cej.2019.03.271                | Modification made by surface coating, all tested scaffolds are nanoporous, i.e. no control |
| Xin Jing; Hao-Yang M     | Fabrication of shish-kebab structured poly(ε-caprolactone) electrospun nanofibers that mimic collagen fibrils: Effect of solvents and matrigel functionalization                        | Polymer                 | 10.1016/j.polymer.2014.08.061            |                                                                                            |
| Xin Jing; Heng Li; Ha    | Fabrication of fluffy shish-kebab structured nanofibers by electrospinning, CO2 escaping foaming and controlled crystallization for biomimetic tissue engineering scaffolds             | Chemical Engineering    | 10.1016/j.cej.2019.04.194                |                                                                                            |
| Xu, Ting; Yang, Hong     | Poly(lactic Acid Nanofiber Scaffold Decorated with Chitosan Islandlike Topography for Bone Tissue Engineering                                                                           | ACS applied material    | 10.1021/acsami.7b01176                   |                                                                                            |
| Yang, F.; Xu, C. Y.; Ko  | Characterization of neural stem cells on electrospun poly(L-lactic acid) nanofibrous scaffold                                                                                           | Journal of biomateria   | <a href="#">10.1163/1568562042459733</a> | Fiber topography not studied                                                               |
| Yi Xia; Shuang Li; Chu   | A multivalent polyanion-dispersed carbon nanotube toward highly bioactive nanostructured fibrous stem cell scaffolds                                                                    | Applied Materials To    | 10.1016/j.apmt.2019.07.006               | CNT use does not allow for isolation of topographical effects                              |
| YongBok Kim; GeunH       | Highly roughened polycaprolactone surfaces using oxygen plasma-etching and in vitro mineralization for bone tissue regeneration: Fabrication, characterization, and cellular activities | Colloids and Surface    | 10.1016/j.colsurfb.2014.11.033           | Coating with SBF doe not allow for isolation of topographical effects                      |
| Yu, T.; Gleeson, S. E.;  | Electrospun poly(epsilon-caprolactone) nanofiber shish kebabs mimic mineralized bony surface features                                                                                   | Journal of Biomedica    | 10.1002/jbm.b.34207                      |                                                                                            |
| Yu, T.; Marcolongo, M    | Electrospun Poly(ε-caprolactone) nanofiber shish kebabs mimicking mineralized collagen fibrils in bone                                                                                  | J. Orthop. Res.         |                                          | Article could not be found                                                                 |
| Yu Luo; Shige Wang;      | Carbon nanotube-incorporated multilayered cellulose acetate nanofibers for tissue engineering applications                                                                              | Carbohydrate Polym      | 10.1016/j.carbpol.2012.08.069            | CNT use does not allow for isolation of topographical effects                              |
| Zamani, F.; Amani-Te     | The influence of surface nanoroughness of electrospun PLGA nanofibrous scaffold on nerve cell adhesion and proliferation                                                                | J. Mater. Sci. Mater. M | 10.1007/s10856-013-4905-6                |                                                                                            |
| Zandén, C.; Hellström    | Stem cell responses to plasma surface modified electrospun polyurethane scaffolds                                                                                                       | Nanomed. Nanotech       | 10.1016/j.nano.2014.01.010               |                                                                                            |
| Zhang, C. H.; Cheng, I   | Nanoporous structured carbon nanofiber-bioactive glass composites for skeletal tissue regeneration                                                                                      | Journal of Materials    | 10.1039/c5tb00921a                       | CNT use does not allow for isolation of topographical effects                              |
| Zhi Wang; Quan Qing      | Effects of scaffold surface morphology on cell adhesion and survival rate in vitreous cryopreservation of tenocyte-scaffold constructs                                                  | Applied Surface Scie    | 10.1016/j.apsusc.2016.01.187             | No electrospinning involved                                                                |
| Zhou, Q. H.; Xie, J.; Ba | Engineering aligned electrospun PLLA microfibers with nano-porous surface nanotopography for modulating the responses of vascular smooth muscle cells                                   | Journal of Materials    | 10.1039/c5tb00051c                       |                                                                                            |
