# Supplementary material for: How Fiber Surface Topography Affects Interactions between Cells and Electrospun Scaffolds: A Systematic Review
Source: MDPI journal article supplement (doi:10.3390/polym14010209), 2022-01-05
Supplement: s1 [file s1]

| Data to be extracted                                                                                            | Data |
|-----------------------------------------------------------------------------------------------------------------|------|
| Title                                                                                                           |      |
| Author(s)                                                                                                       |      |
| DOI                                                                                                             |      |
| Year of publication                                                                                             |      |
| Study objective as stated                                                                                       |      |
| Electrospun Material                                                                                            |      |
| Fiber surface topography modification method                                                                    |      |
| Other modifications that arose from the topography modification (e.g. chemical modification)                    |      |
| Other modifications performed independently from topography modification that may have a bearing on the results |      |
| Fiber surface topography characterization performed, if any                                                     |      |
| Results of surface topography characterization, if any                                                          |      |
| Control/comparator used for cell assay                                                                          |      |
| Cells used for study                                                                                            |      |
| Cell viability outcome, if any                                                                                  |      |

|                                                                    |  |
|--------------------------------------------------------------------|--|
| Cell adhesion outcome, if any                                      |  |
| Cell proliferation outcome, if any                                 |  |
| Cell differentiation outcome, if any                               |  |
| Other cell behavior data                                           |  |
| Author conclusions regarding effect of surface topography on cells |  |
