# Supplementary material for: How Fiber Surface Topography Affects Interactions between Cells and Electrospun Scaffolds: A Systematic Review
Source: Polymers (Basel). 2022 Jan 5;14(1):209. doi: 10.3390/polym14010209 (PMC8747153; doi:10.3390/polym14010209)
Supplement: Supplementary file 1 [file polymers-14-00209-s001.zip]

Archive with 4 entries (4 files):
- Supplementary Information File S1.pdf
- Supplementary Information File S2.pdf
- Supplementary Information File S3.pdf
- Supplementary Information File S4.pdf
